# Supplementary material for: Aldolase B-driven lactagenesis and CEACAM6 activation promote cell renewal and chemoresistance in colorectal cancer through the Warburg effect
Source: PubMed Central journal article supplement (PMC10564793; doi:10.1038/s41419-023-06187-z), 2023-10-10

# Raw image for Figure 1C

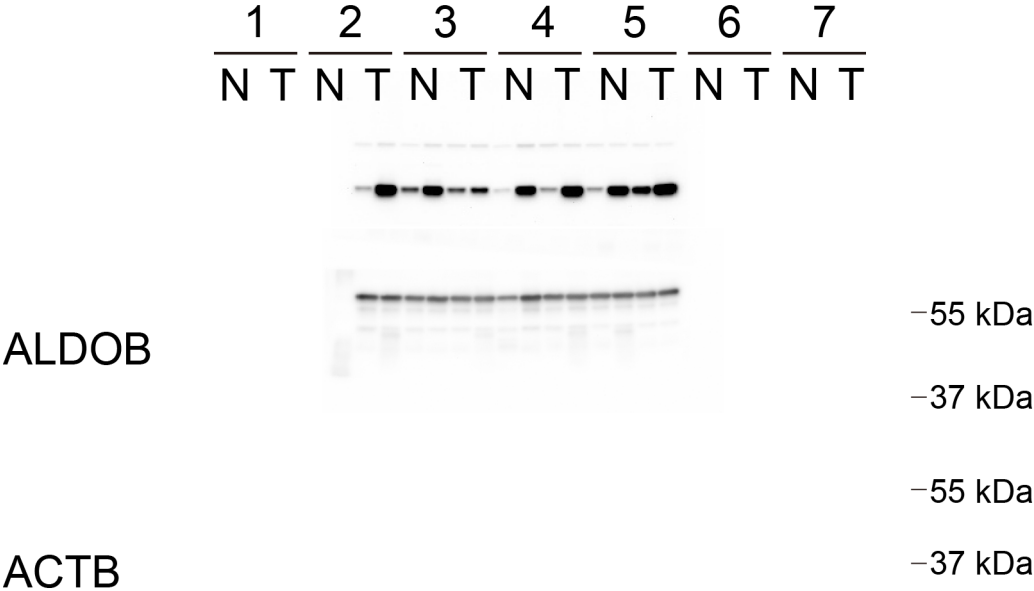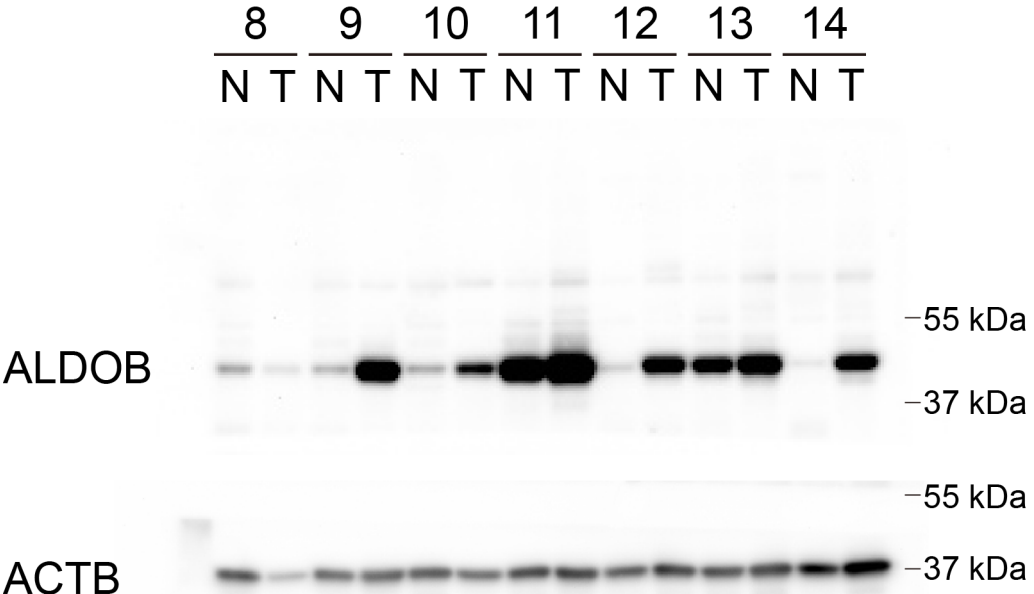

# Raw image for Figure 2A

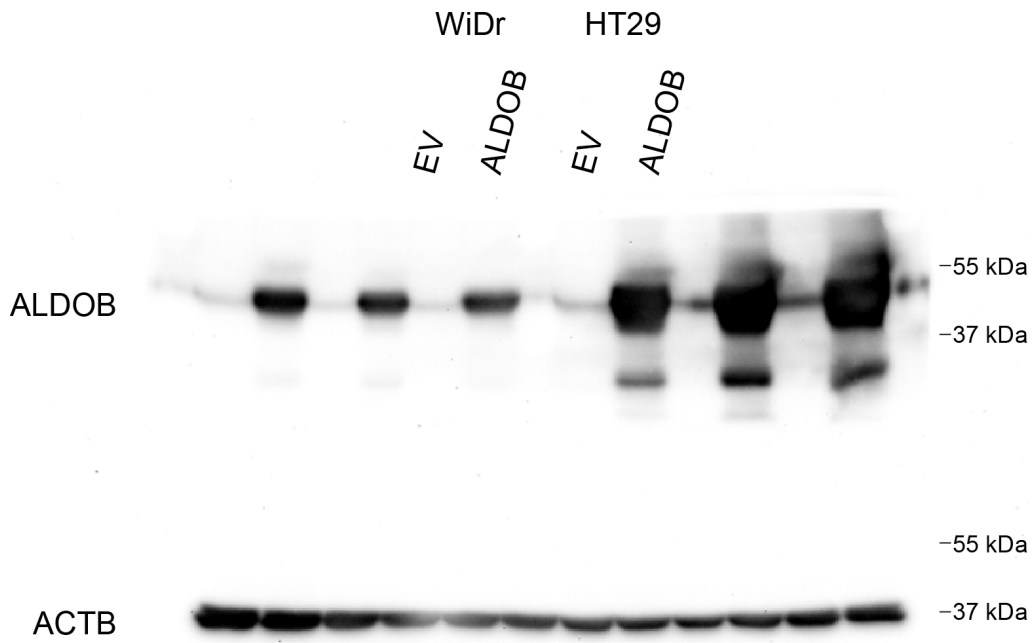

# Raw image for Figure 2E

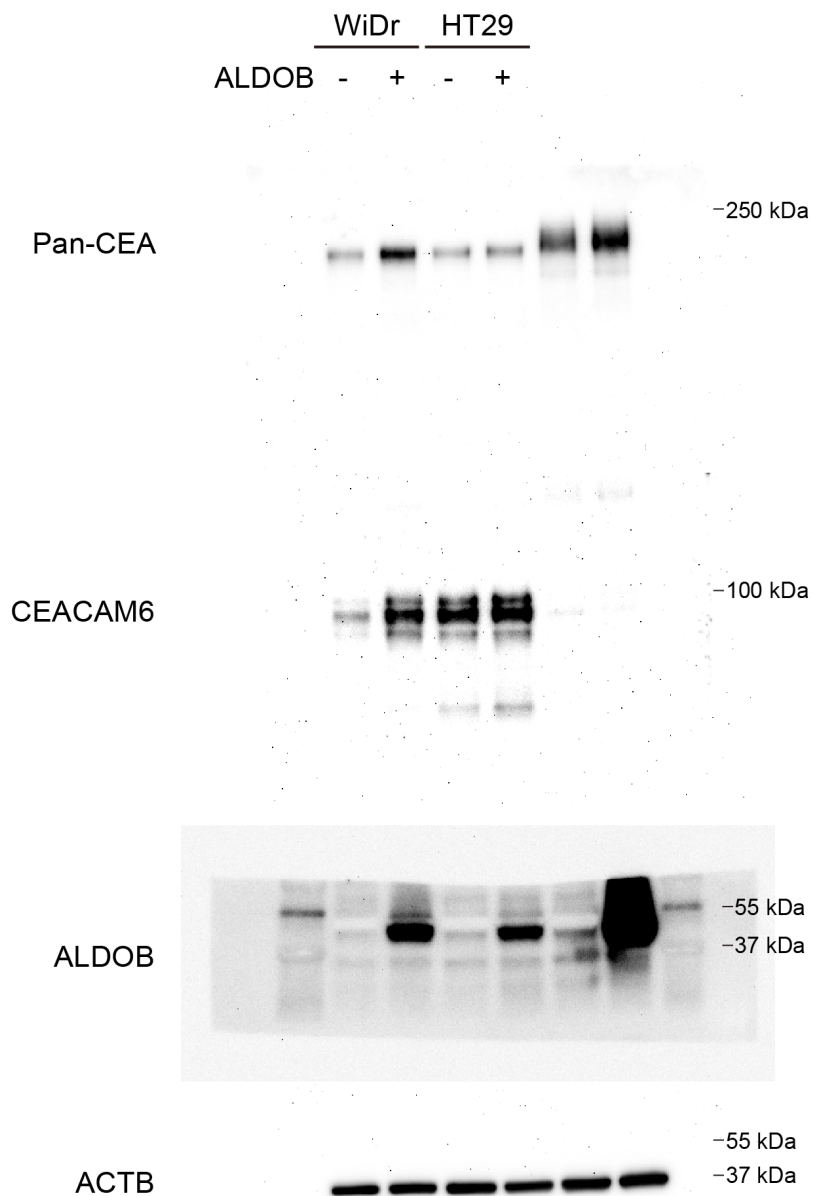

# Raw image for Figure 2F

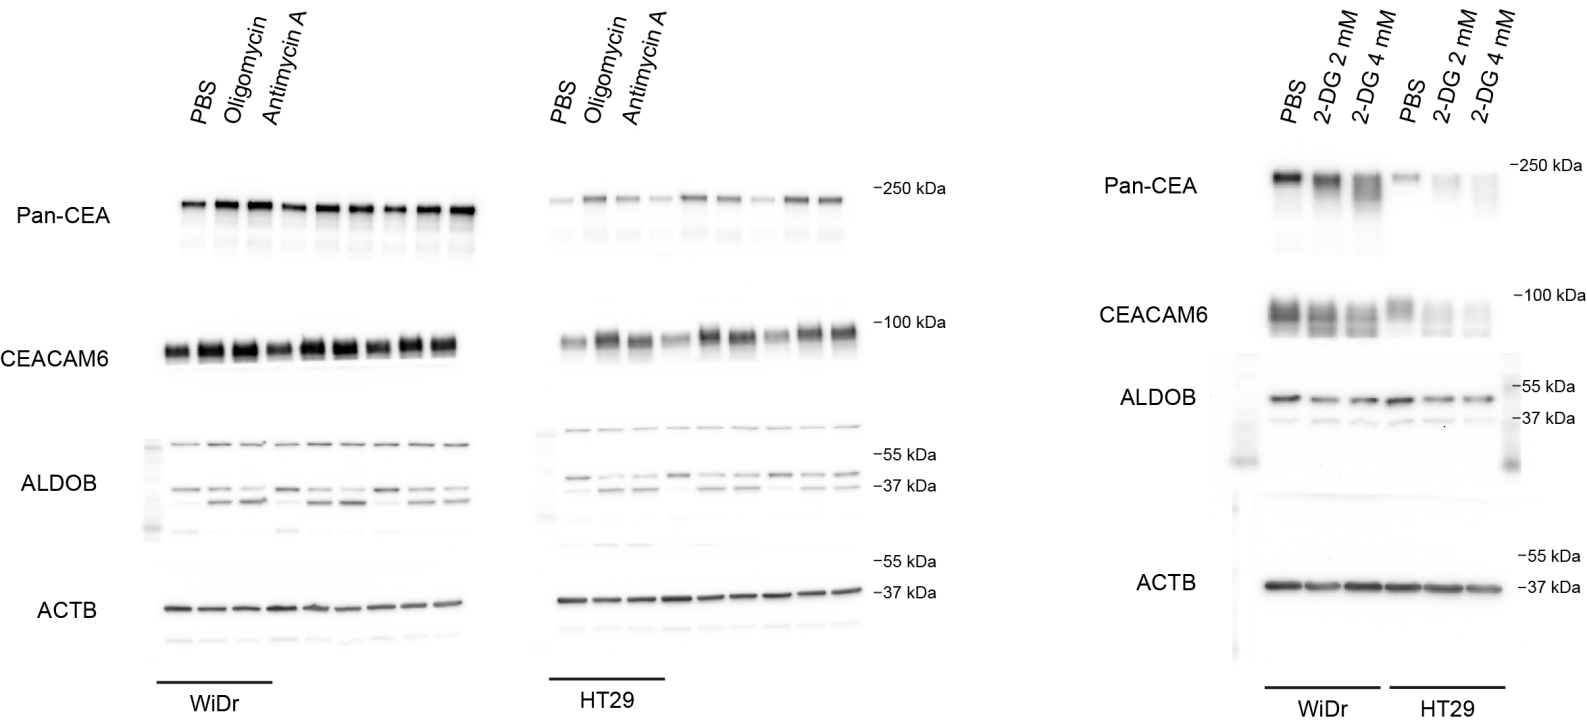

# Raw image for Figure 2G

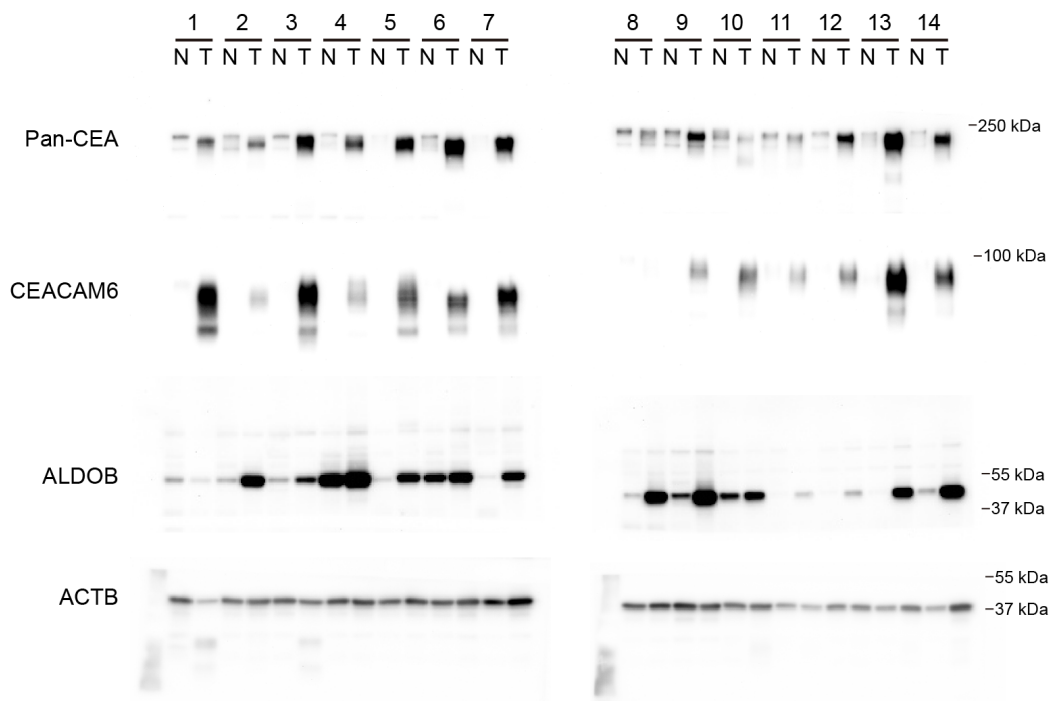

# Raw image for Figure 3E

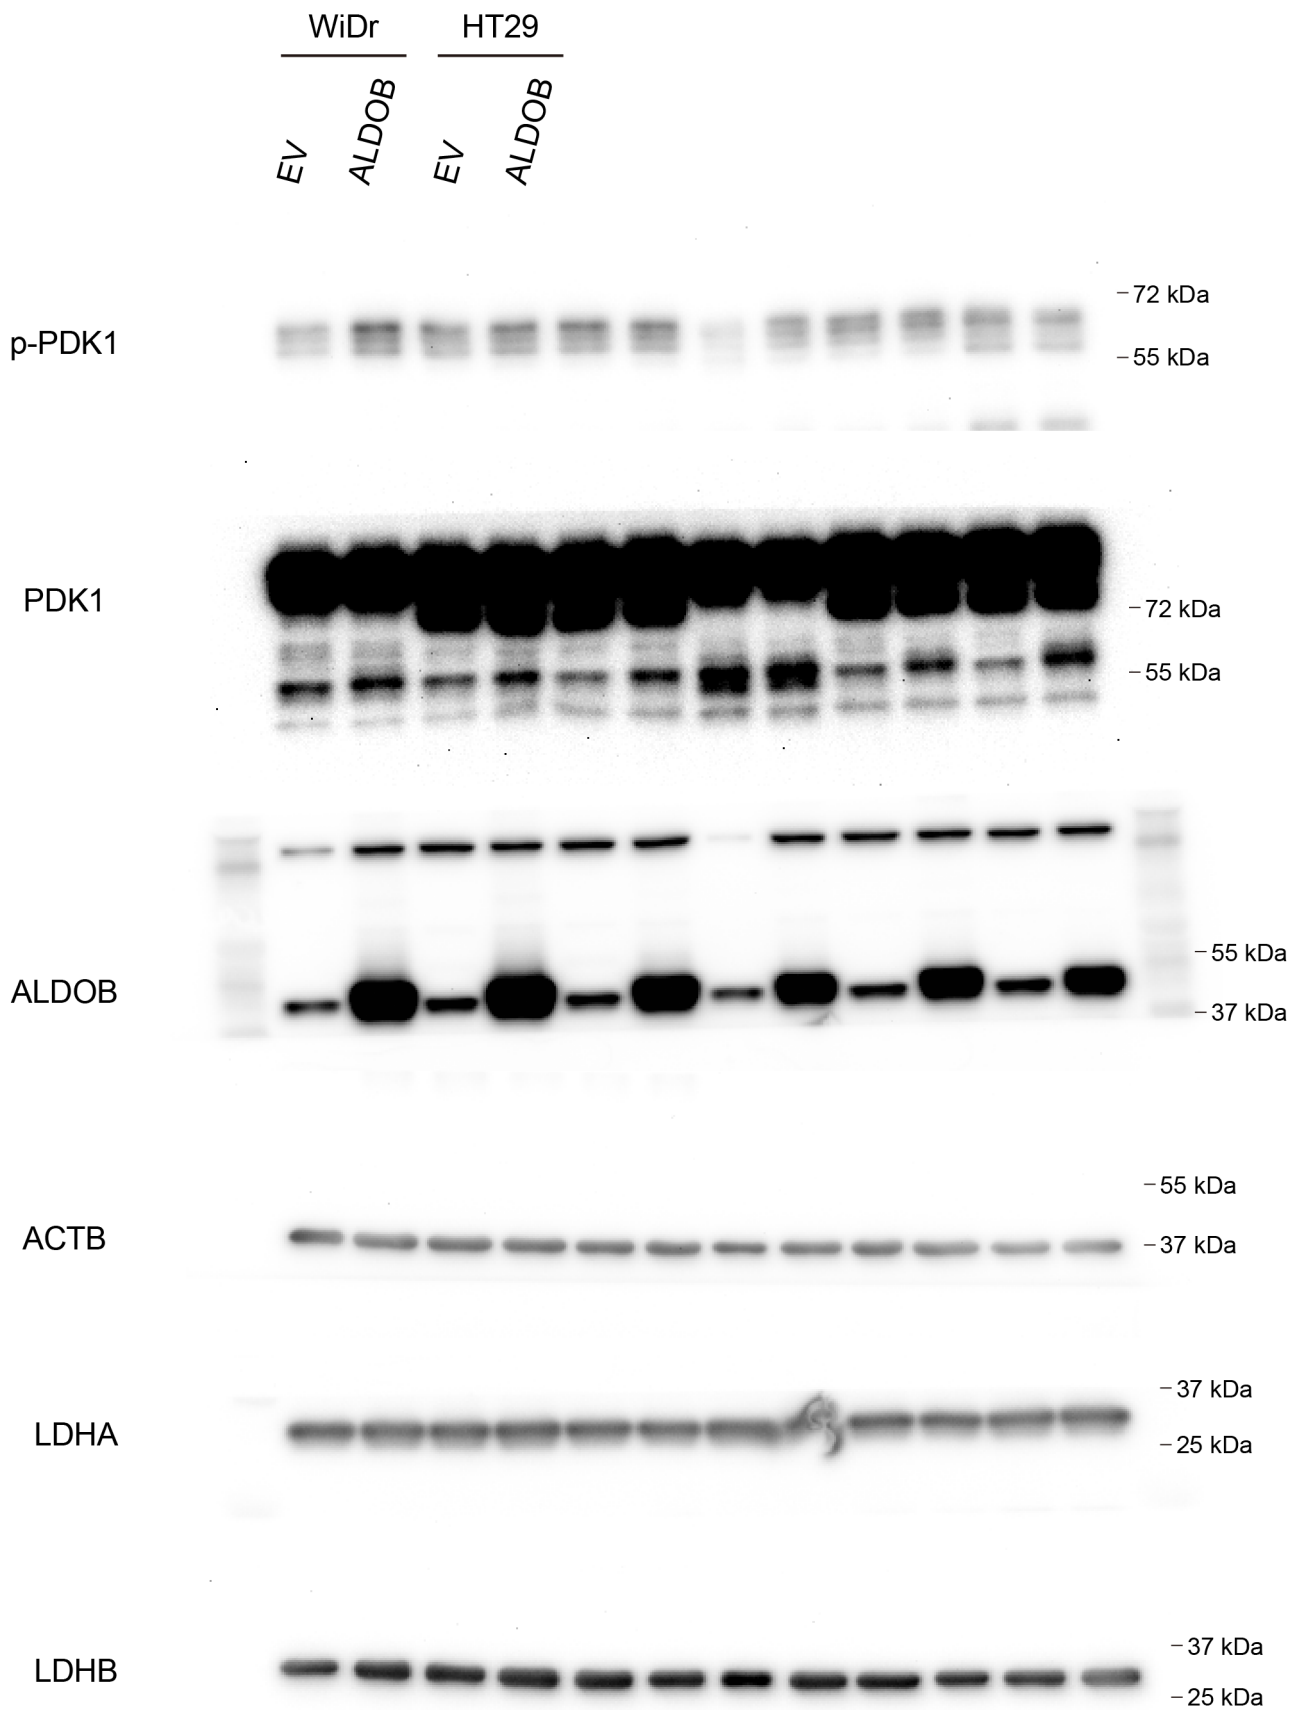





# Raw image for Figure 4C

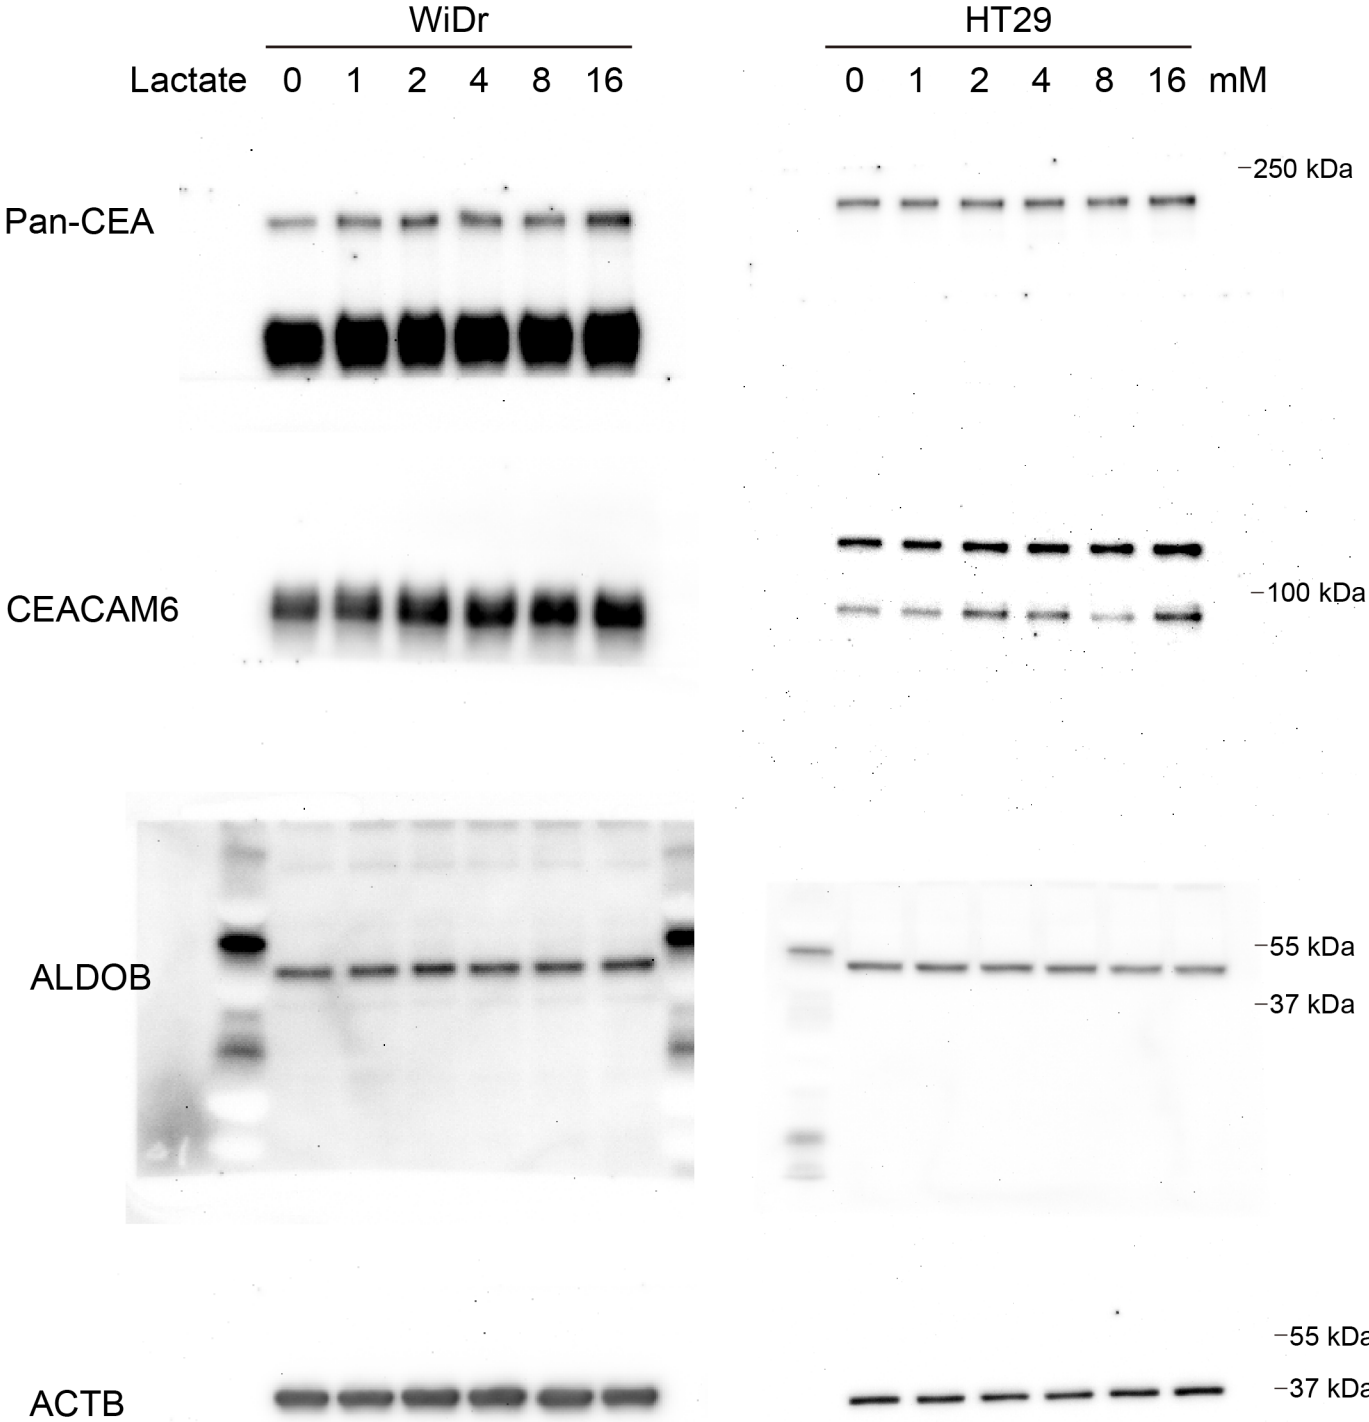



# Raw image for Figure 4F

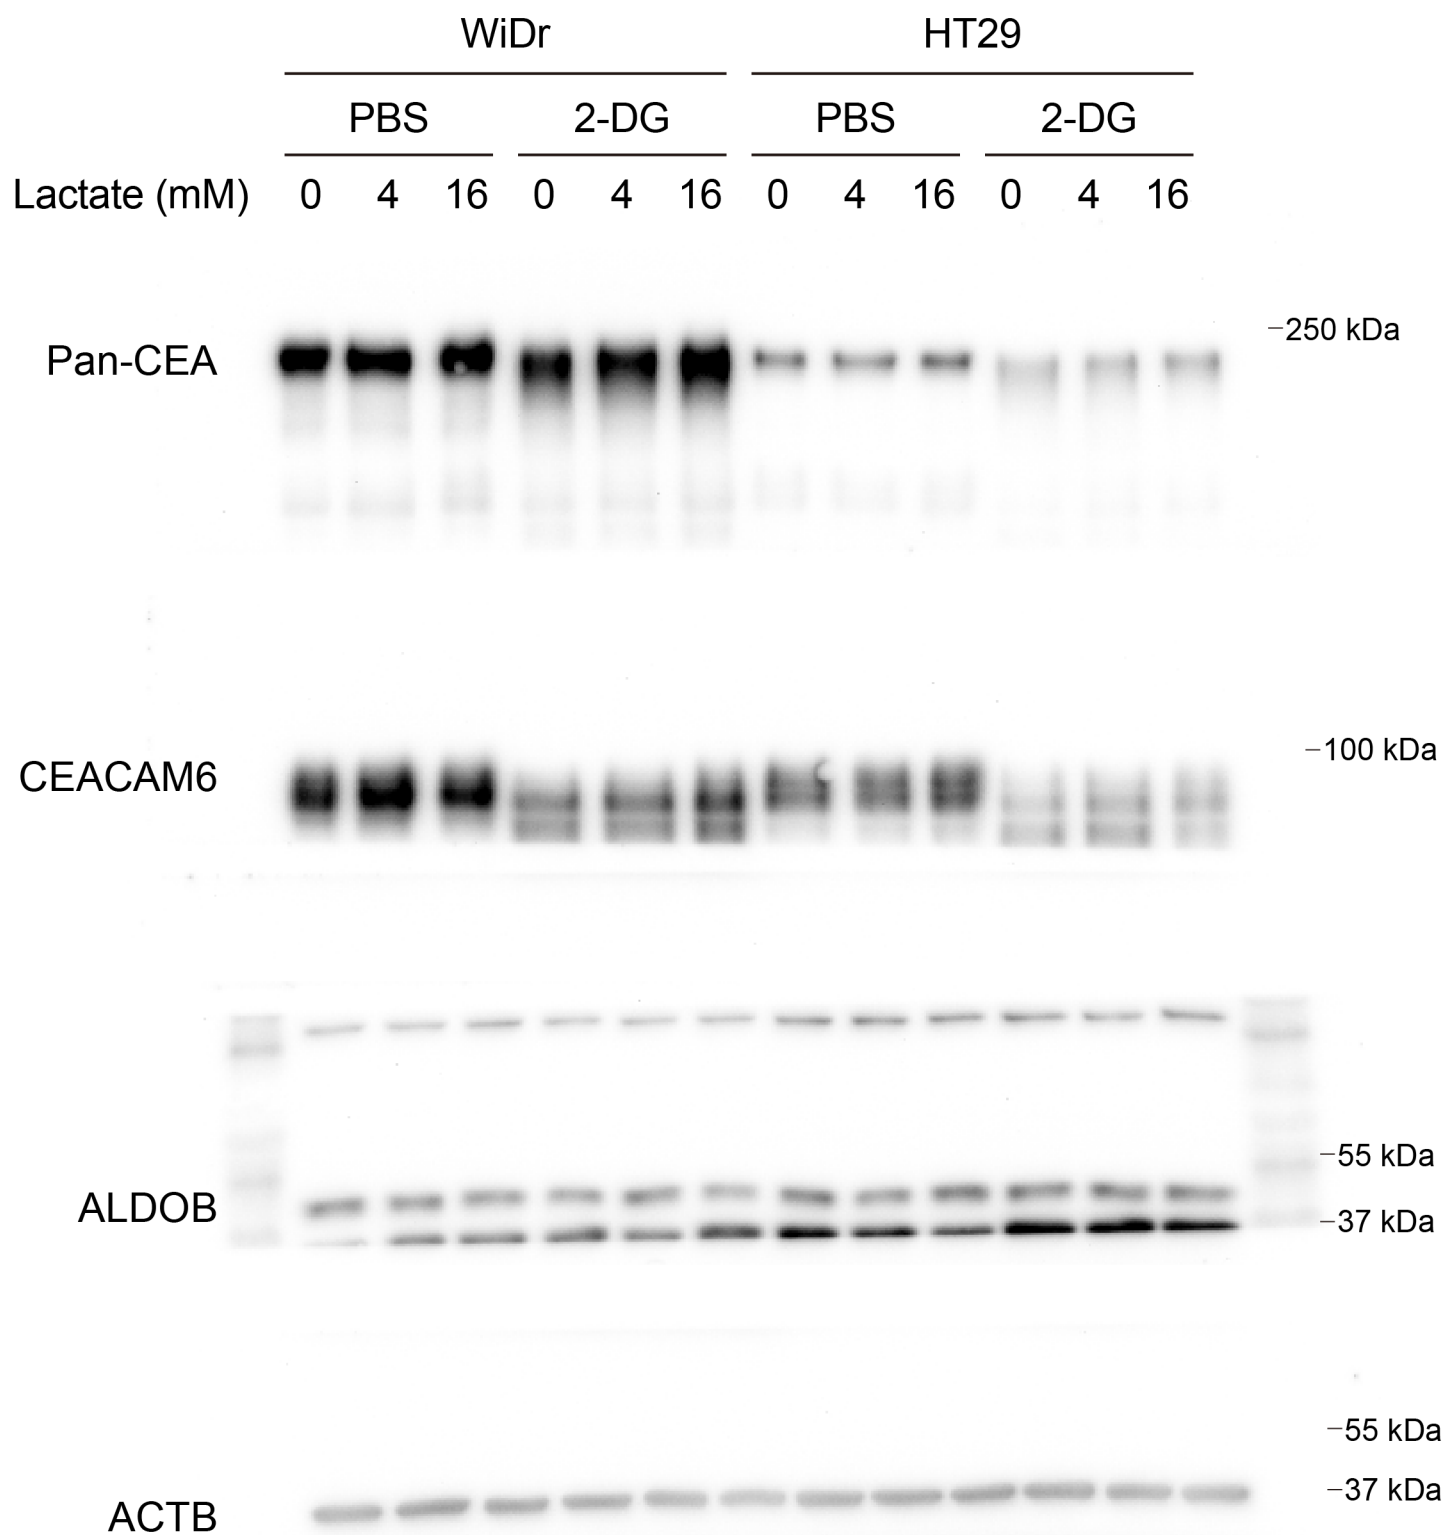

# Raw image for Figure 5A

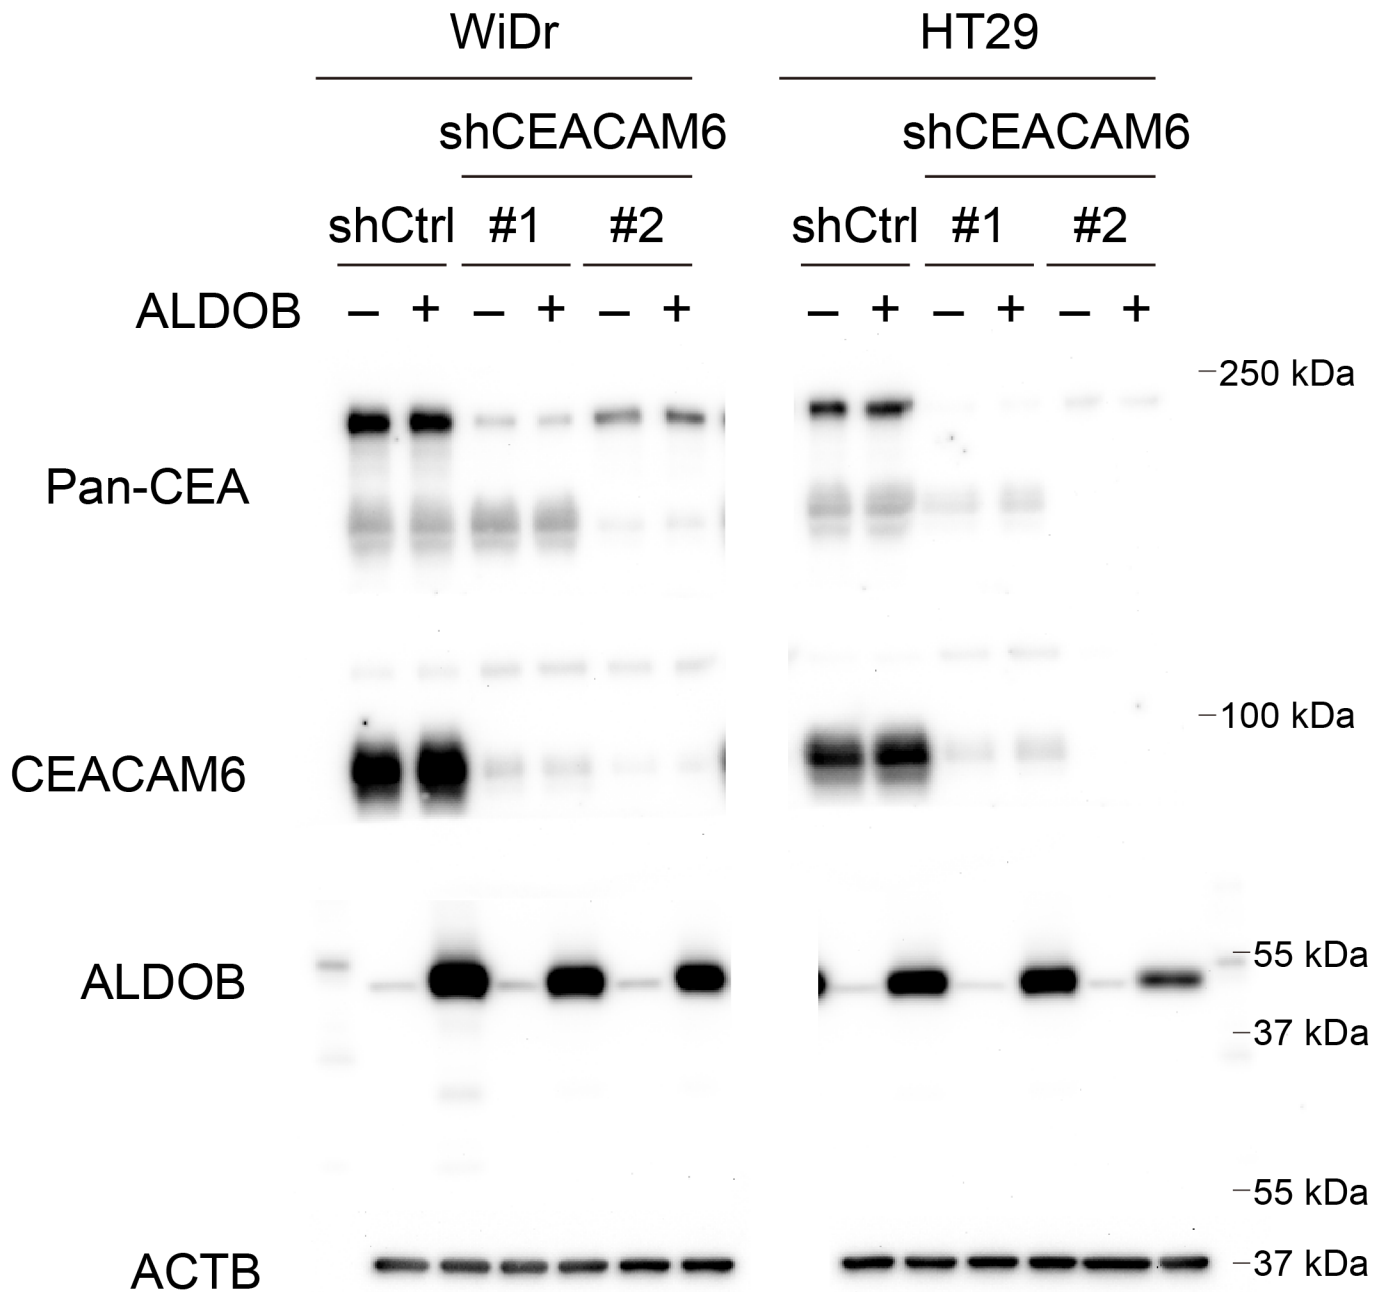

# Raw image for Figure 5E

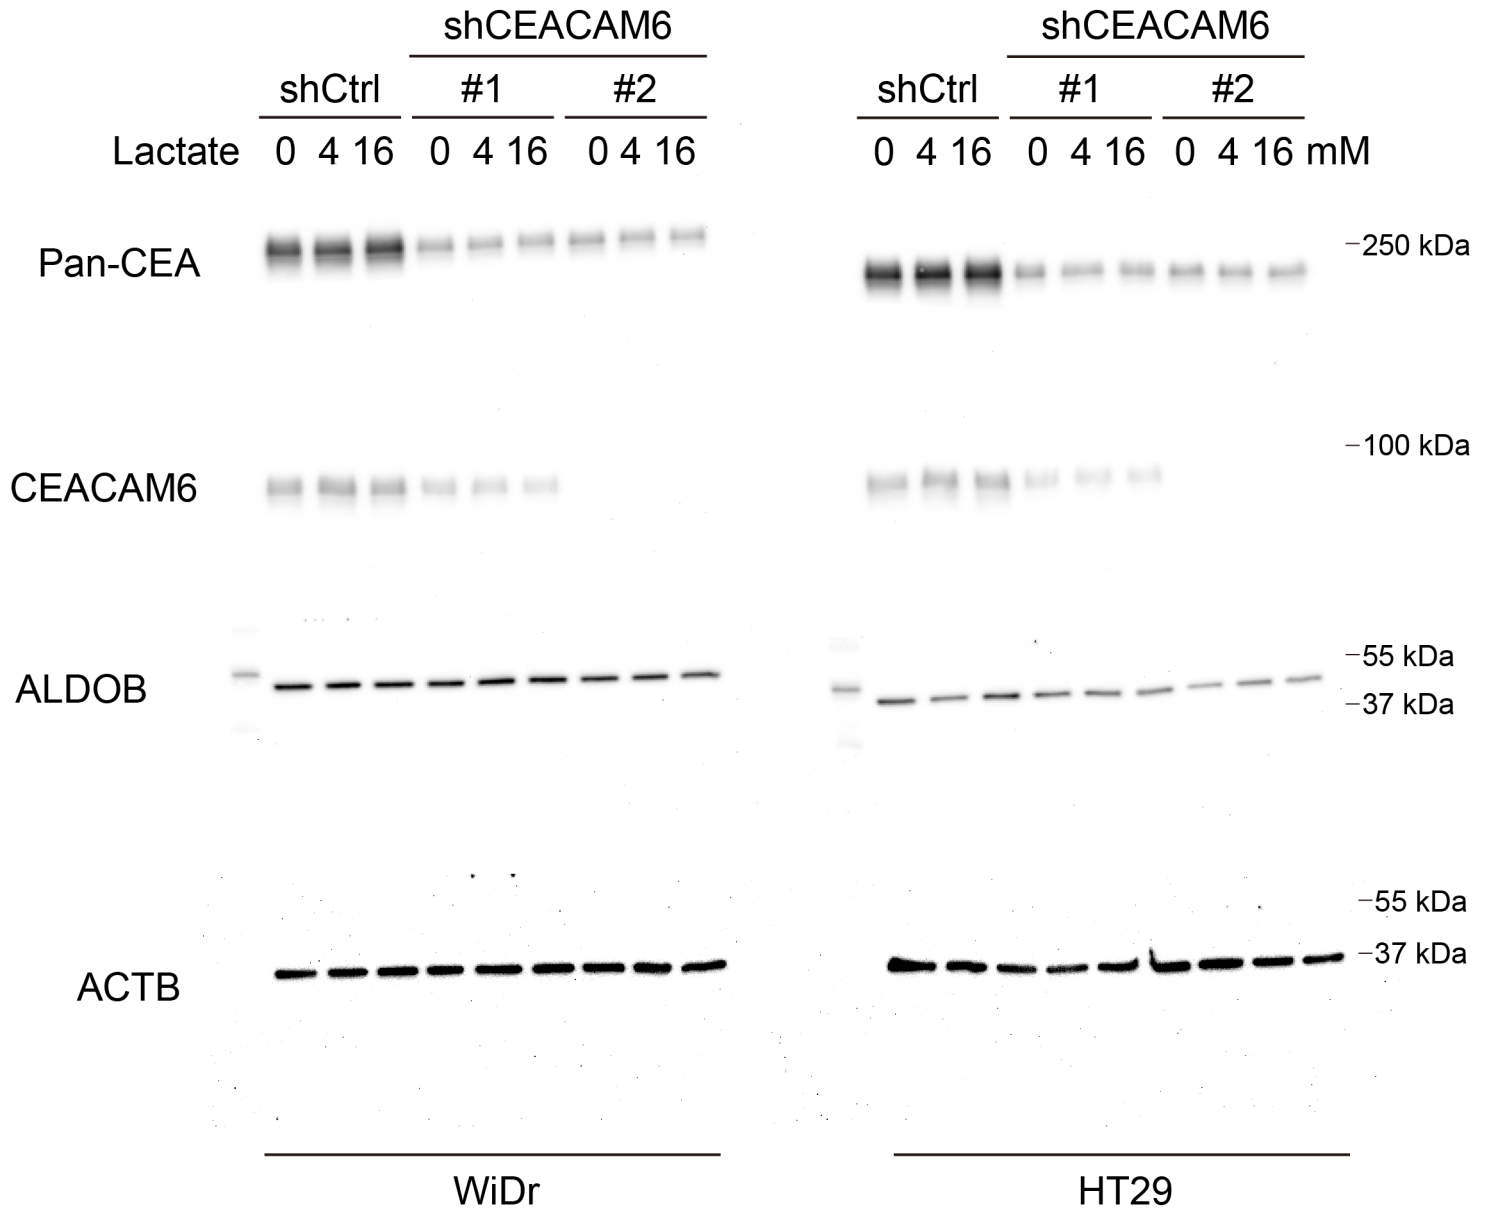

# Raw image for Figure 6C

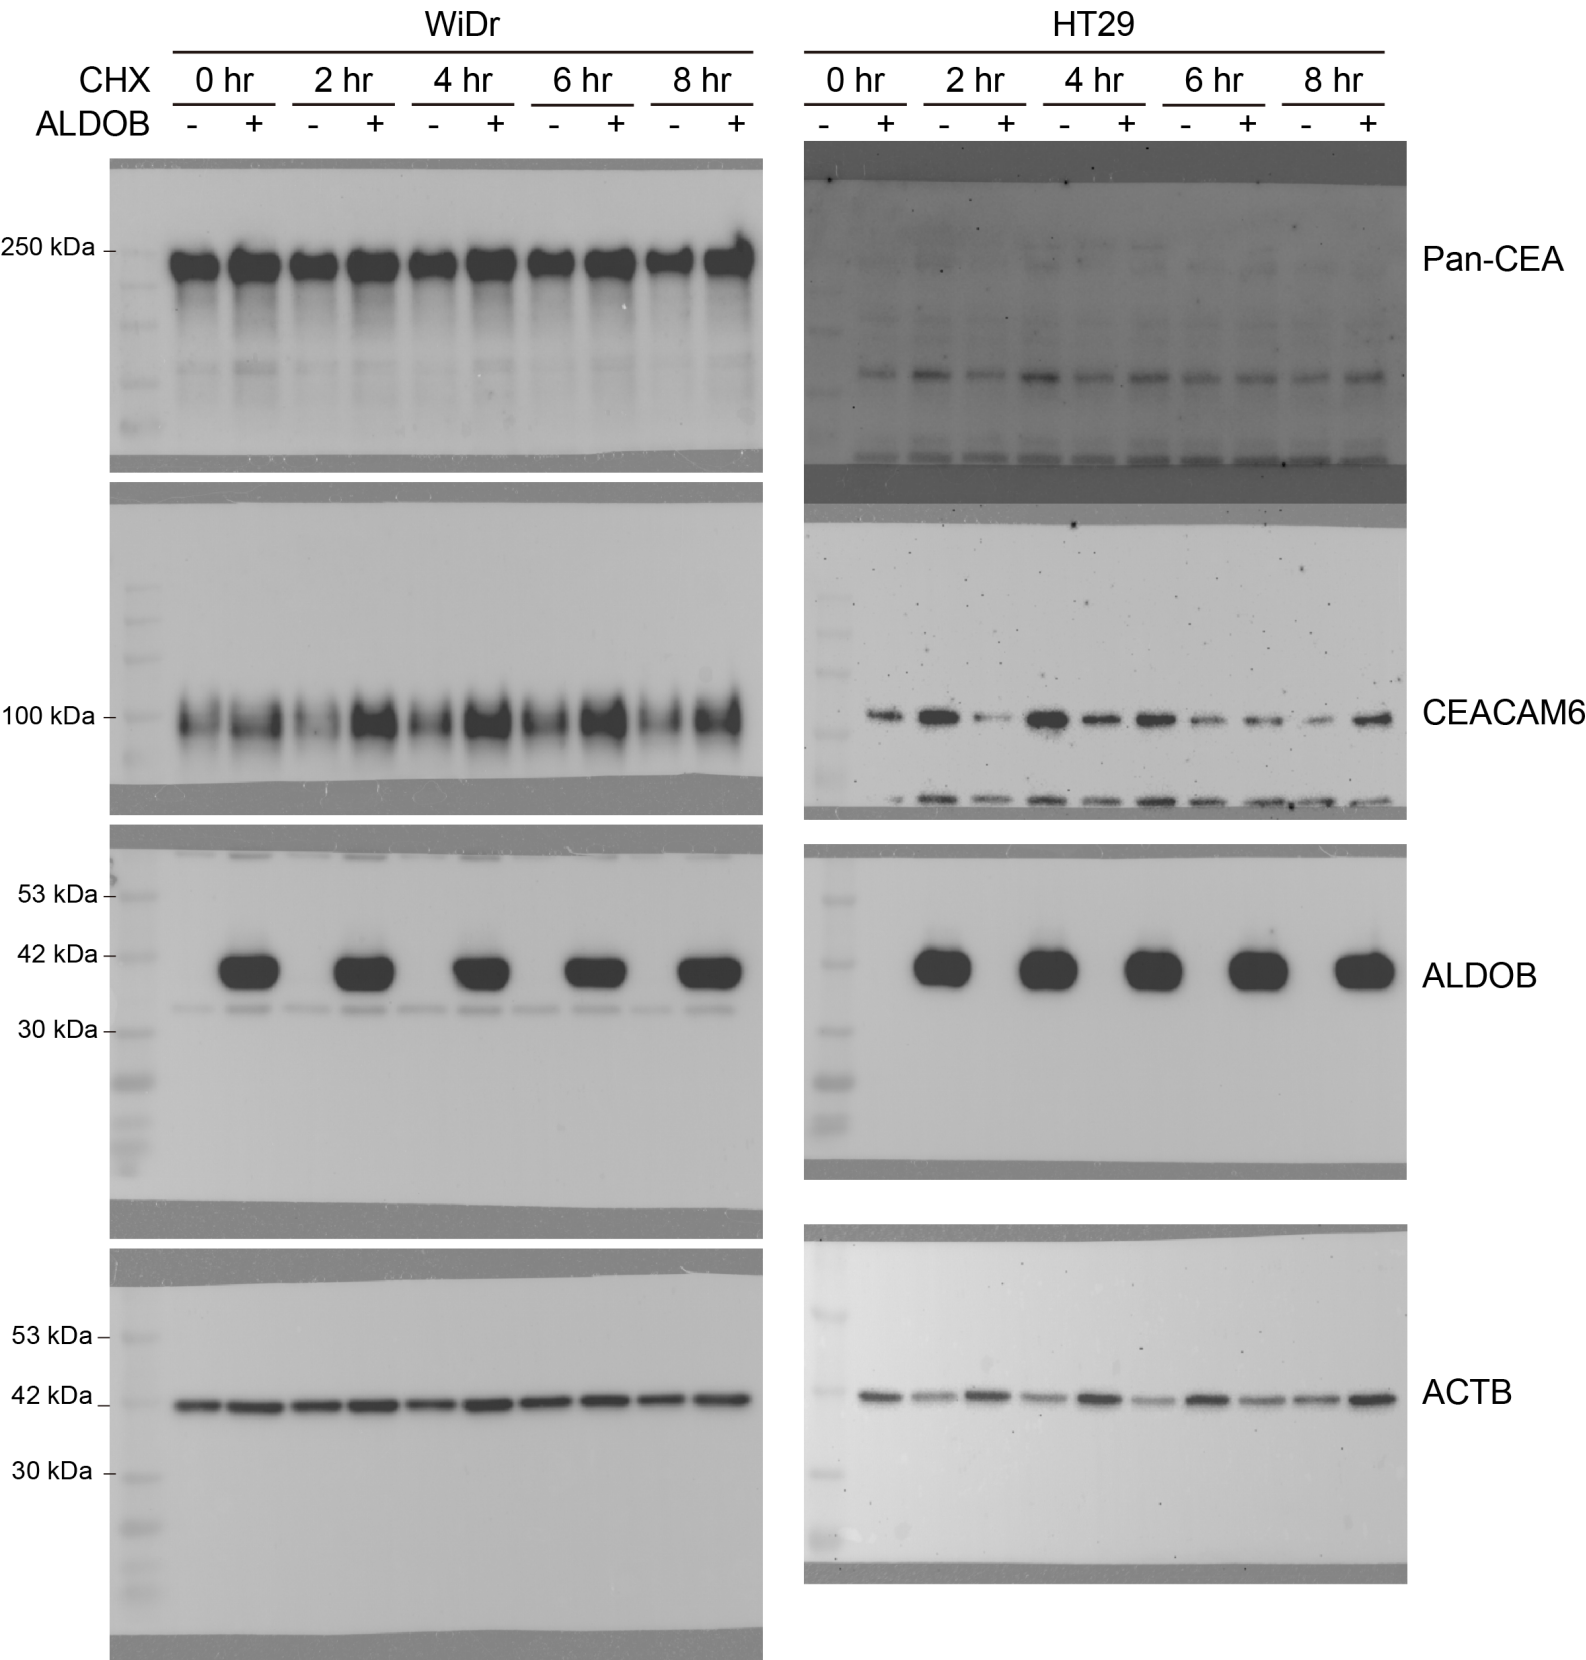

# Raw image for Figure 6D

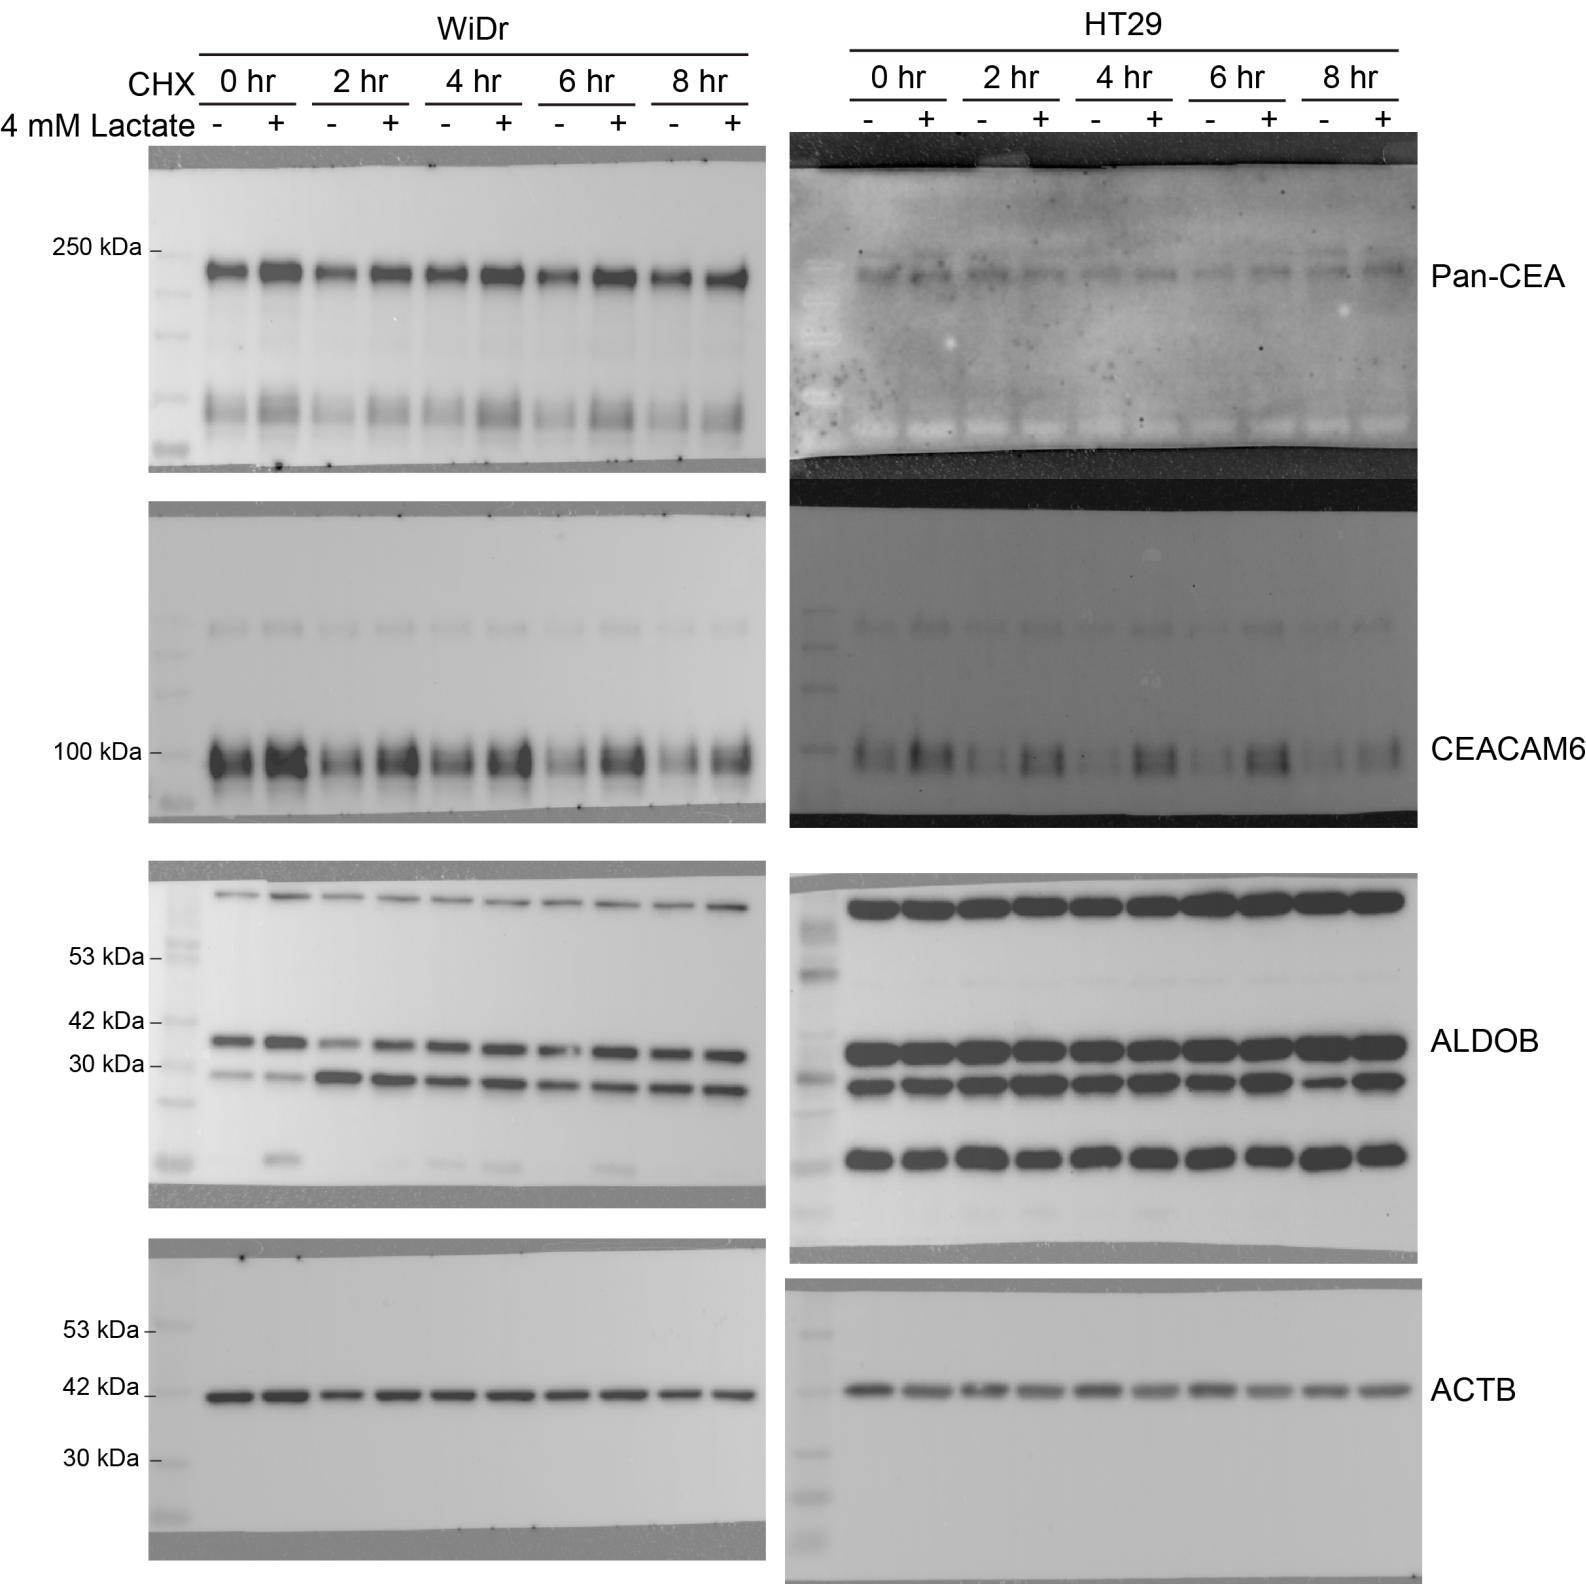



# Raw image for Figure 6E

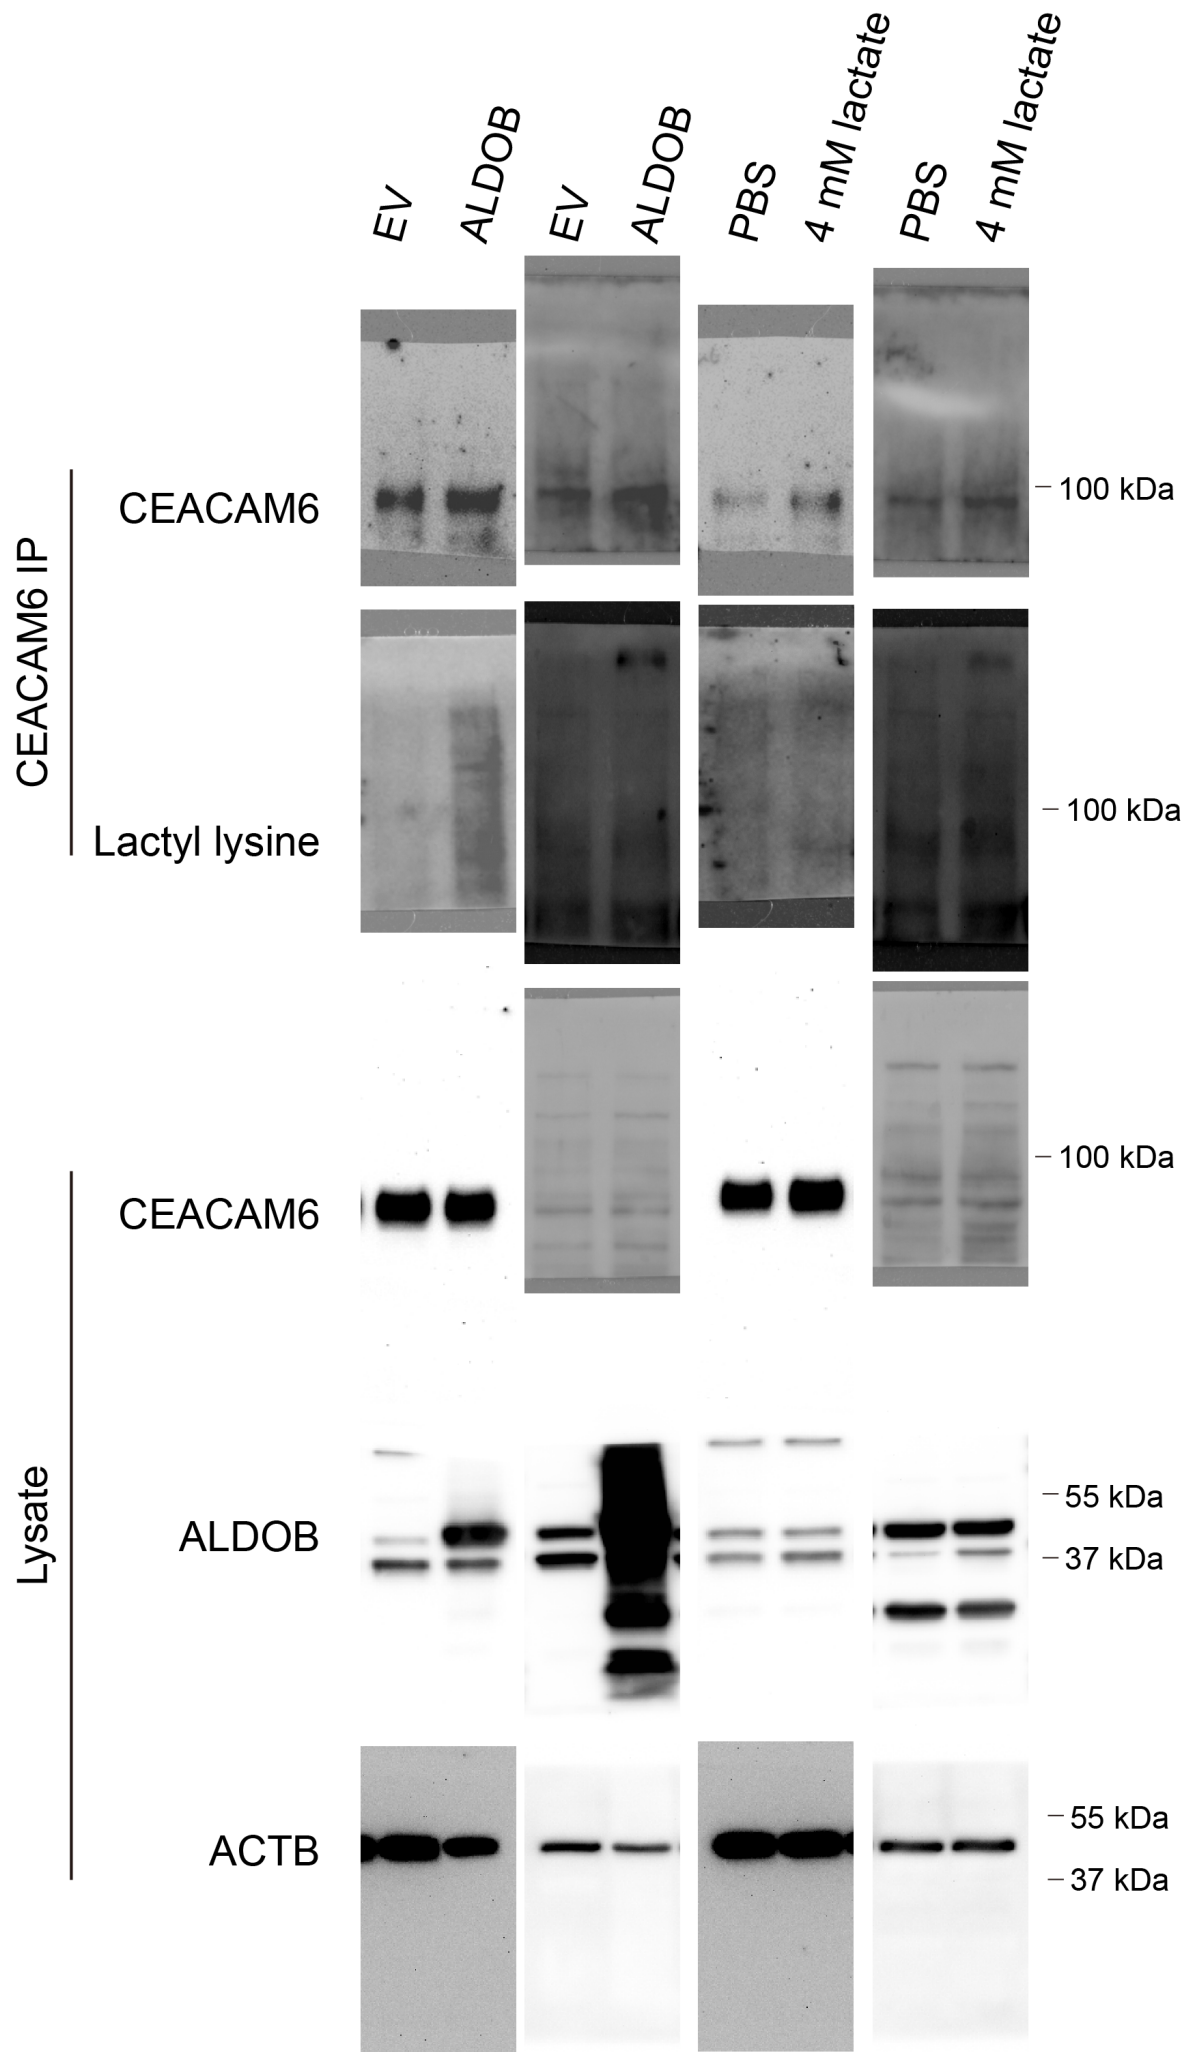

Supplement: 41419_2023_6187_MOESM2_ESM.pdf [file 41419_2023_6187_MOESM2_ESM.pdf]
